# Supplementary material for: Mahanine drives pancreatic adenocarcinoma cells into endoplasmic reticular stress-mediated apoptosis through modulating sialylation process and Ca2+-signaling
Source: PubMed Central journal article supplement (PMC5834441; doi:10.1038/s41598-018-22143-w), 2018-03-02
Supplement: 41598_2018_22143_MOESM1_ESM.pdf [file 41598_2018_22143_MOESM1_ESM.pdf]

**Mahanine drives pancreatic adenocarcinoma cells into endoplasmic reticular stress-mediated apoptosis through modulating sialylation process and Ca<sup>2+</sup>-signaling**

Sayantani Sarkar Bhattacharya<sup>1</sup>, Chandan Mandal<sup>1</sup>, Reinhard Schwartz Albiez<sup>2</sup>, Suman Kumar Samanta<sup>1</sup> and Chitra Mandal<sup>1\*</sup>

<sup>1</sup>Cancer Biology and Inflammatory Disorder Division, Council of Scientific and Industrial Research-Indian Institute of Chemical Biology, Kolkata 700032, India

<sup>2</sup>German Cancer Research Center Heidelberg, Antigen Presentation & T/NK Cell Activation, Clinical Cooperation Unit Applied Tumor Immunity, ImNeuenheimer Feld 280, D-69120 Heidelberg, Germany

**\* Corresponding Author**

Prof. Chitra Mandal

Cancer Biology and Inflammatory Disorder Division

CSIR-Indian Institute of Chemical Biology,

4, Raja S.C. Mallick Road, Kolkata 700032, India

Mobile: 09831036964; Telephone: 033-2429-8861

E mail: [chitra\\_mandal@yahoo.com](mailto:chitra_mandal@yahoo.com); [cmandal@iicb.res.in](mailto:cmandal@iicb.res.in)

**Fig S1**

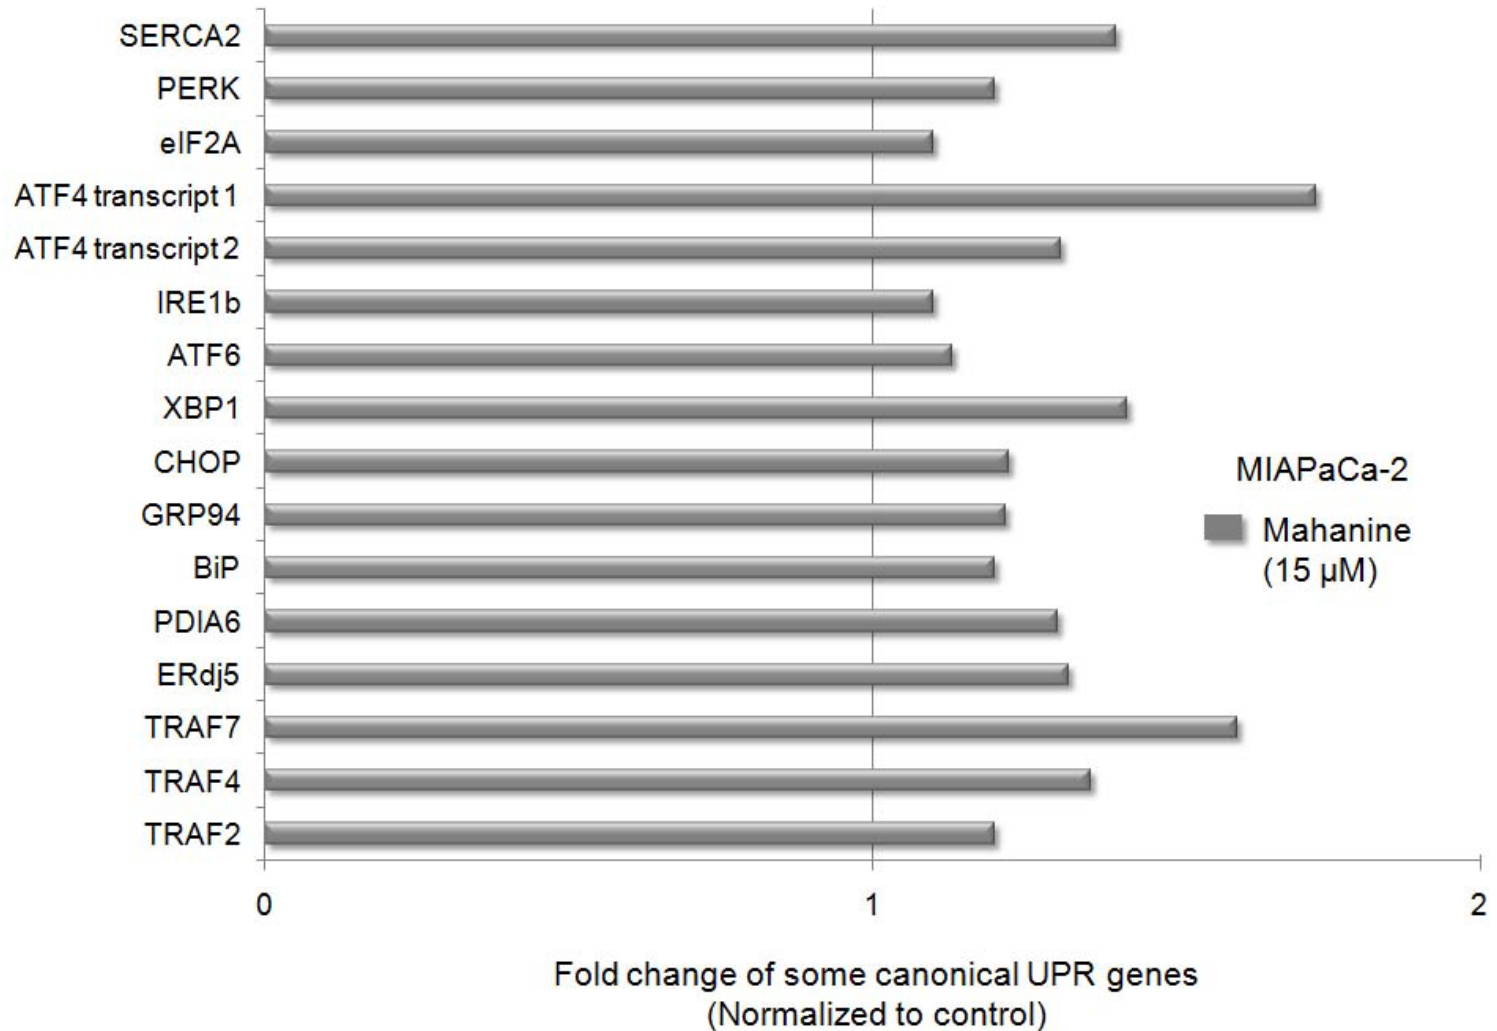

**Figure S1.** Mahanine initiates unfolded protein response in pancreatic carcinoma cells. Fold changes in most of the UPR genes in mahanine-treated (15 μM, 18 h) MIAPaCa-2 cells demonstrated in microarray analysis as describe in material methods. One-way ANOVA was used to analyze the data.

**Fig S2**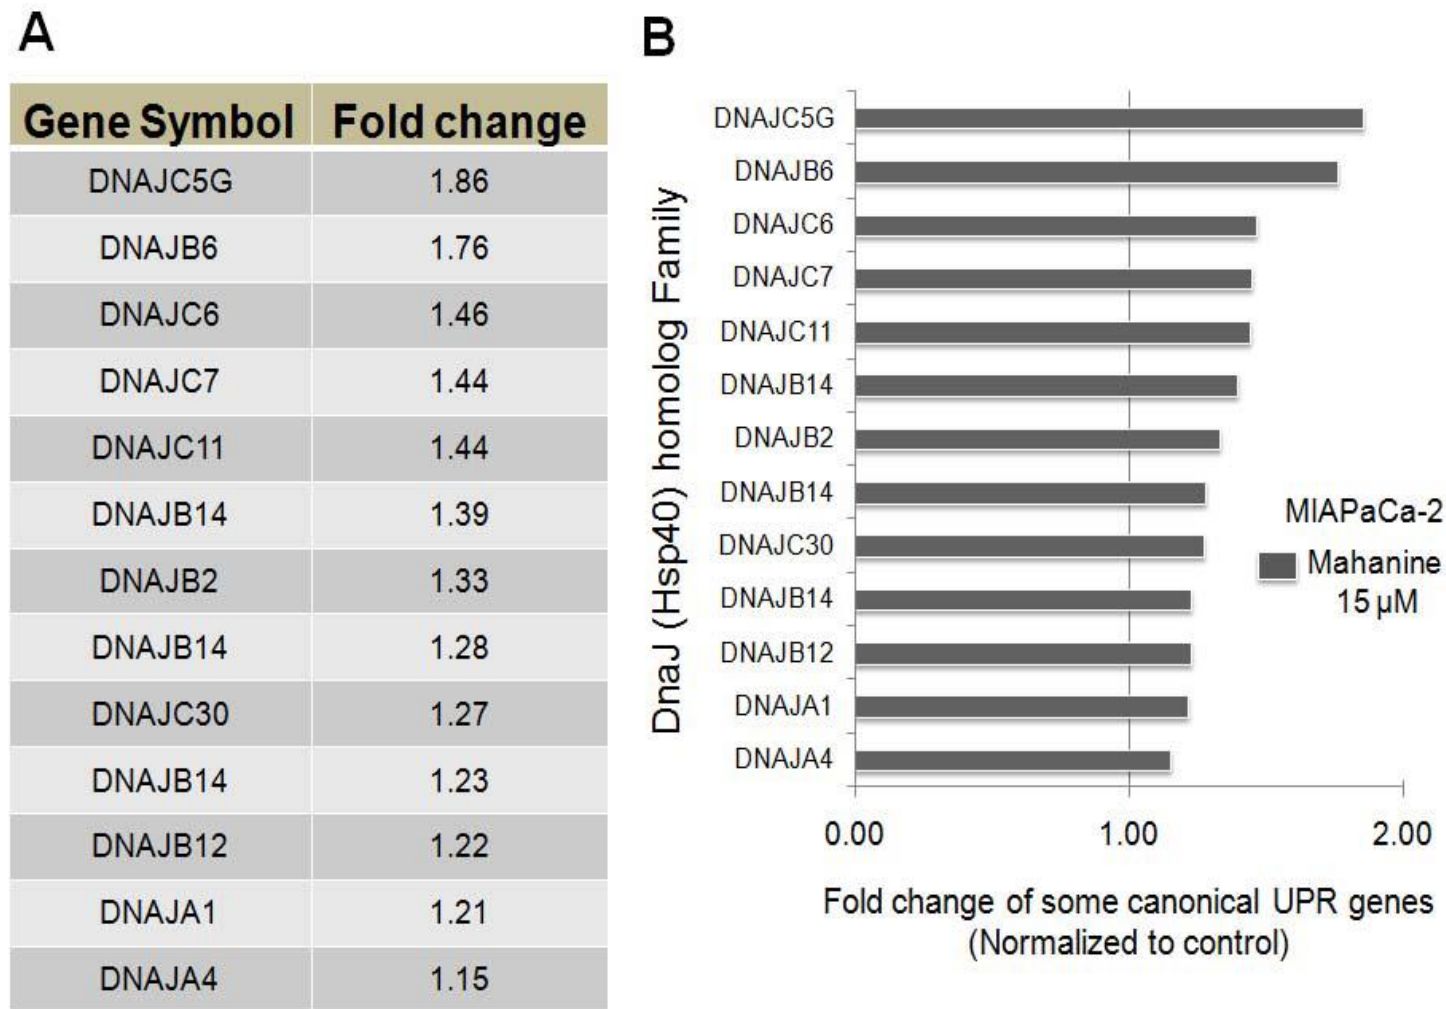

**Figure S2.** Mahanine mediated augmentation of DnaJ or Hsp40 super family gene transcripts in MIAPaCa-2 cells. Tabular (A) and graphical (B) representation of few significantly changed DnaJ transcripts from the microarray data analysis in mahanine-treated (15  $\mu$ M, 18 hr) MIAPaCa2 cells in compare to control as describe in material methods.

**Fig S3**

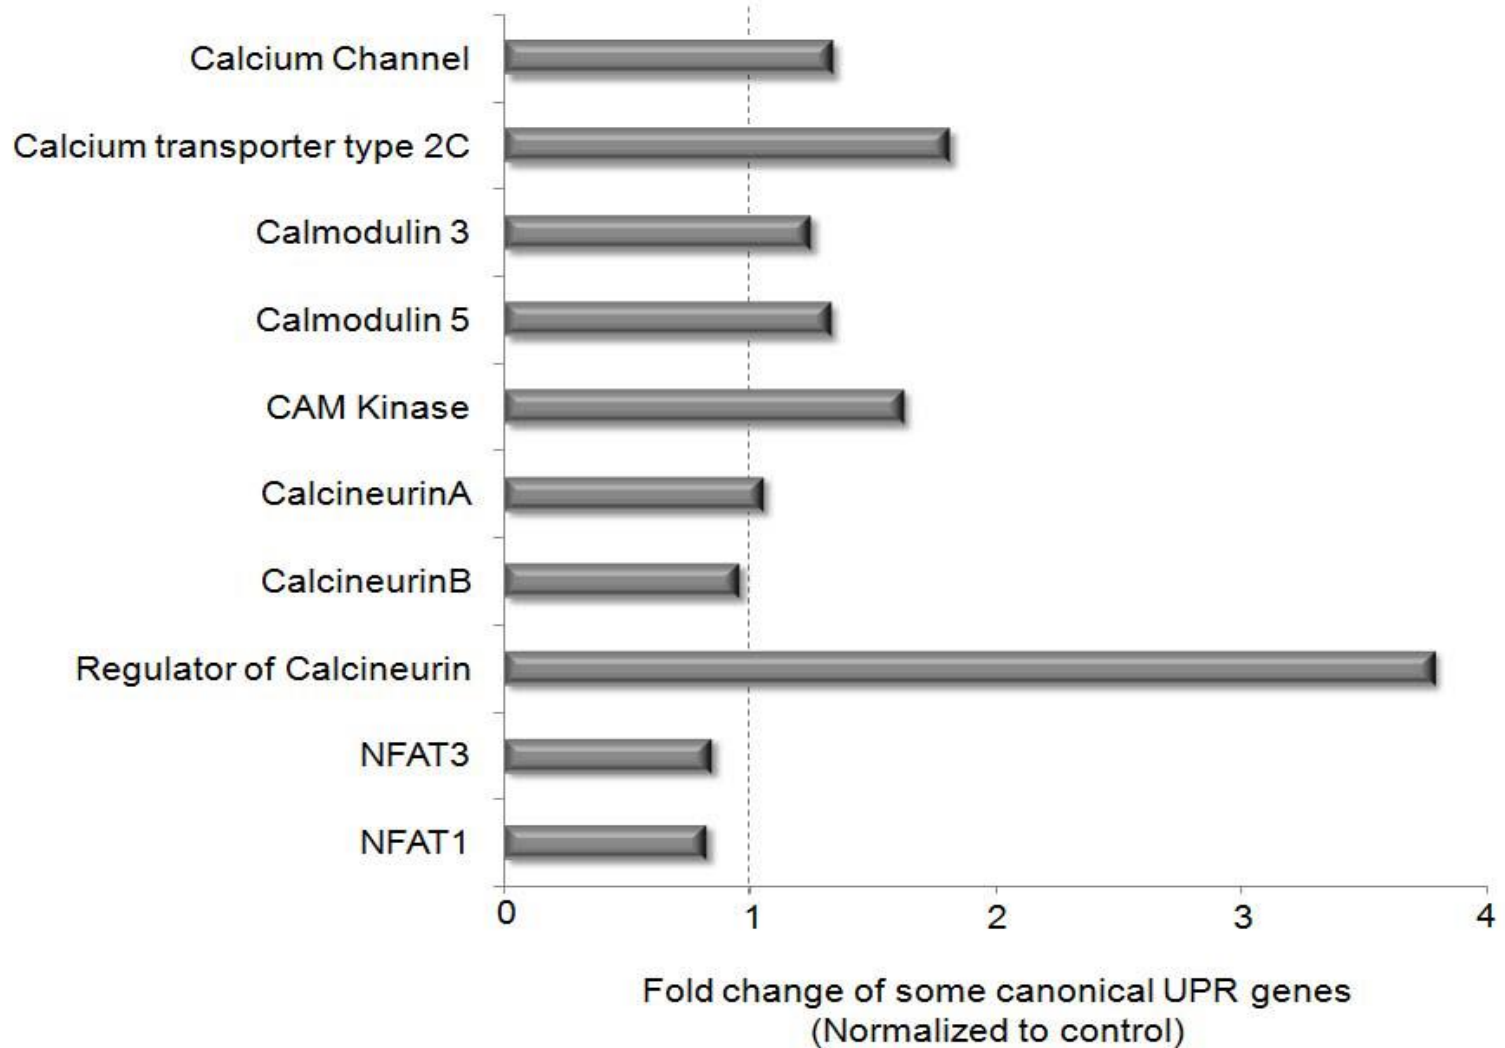

**Figure S3.** Mahanine induced upregulation of gene transcripts involved in  $\text{Ca}^{2+}$  signalling. Data represented as fold change in genes expression from the microarray analysis in mahanine-treated ( $15 \mu\text{M}$ , 18 hr) MIAPaCa2 cells in comparison to control.

**Fig S4**

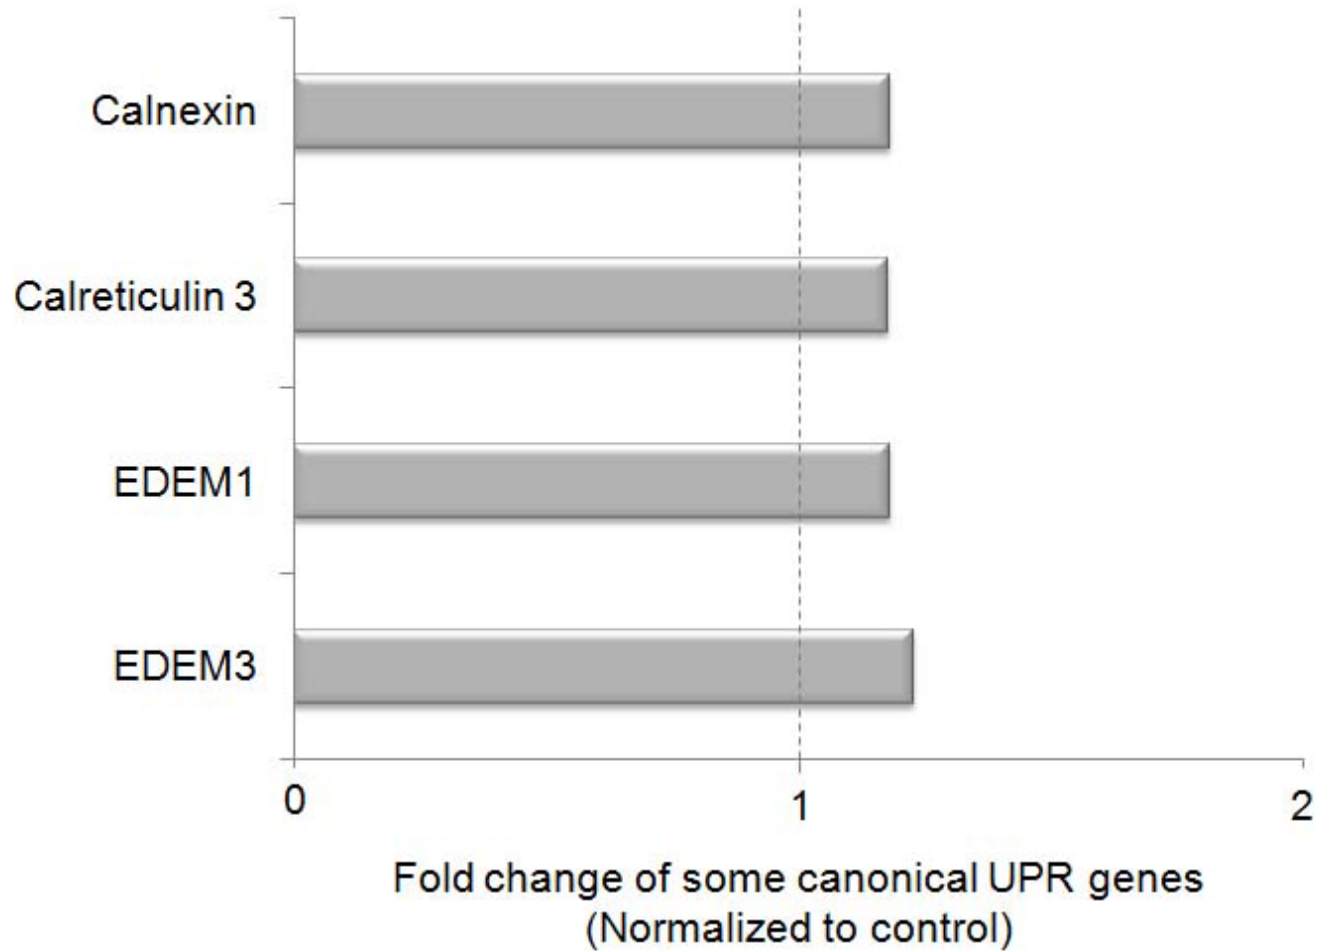

**Figure S4.** Microarray data of gene transcripts involved in Calnexin-Calreticulin chaperone cycle. Data represented as fold change in genes expression from the microarray analysis in mahanine-treated (15  $\mu$ M, 18 hr) MIAPaCa2 cells in comparison to control.

**Fig S5**

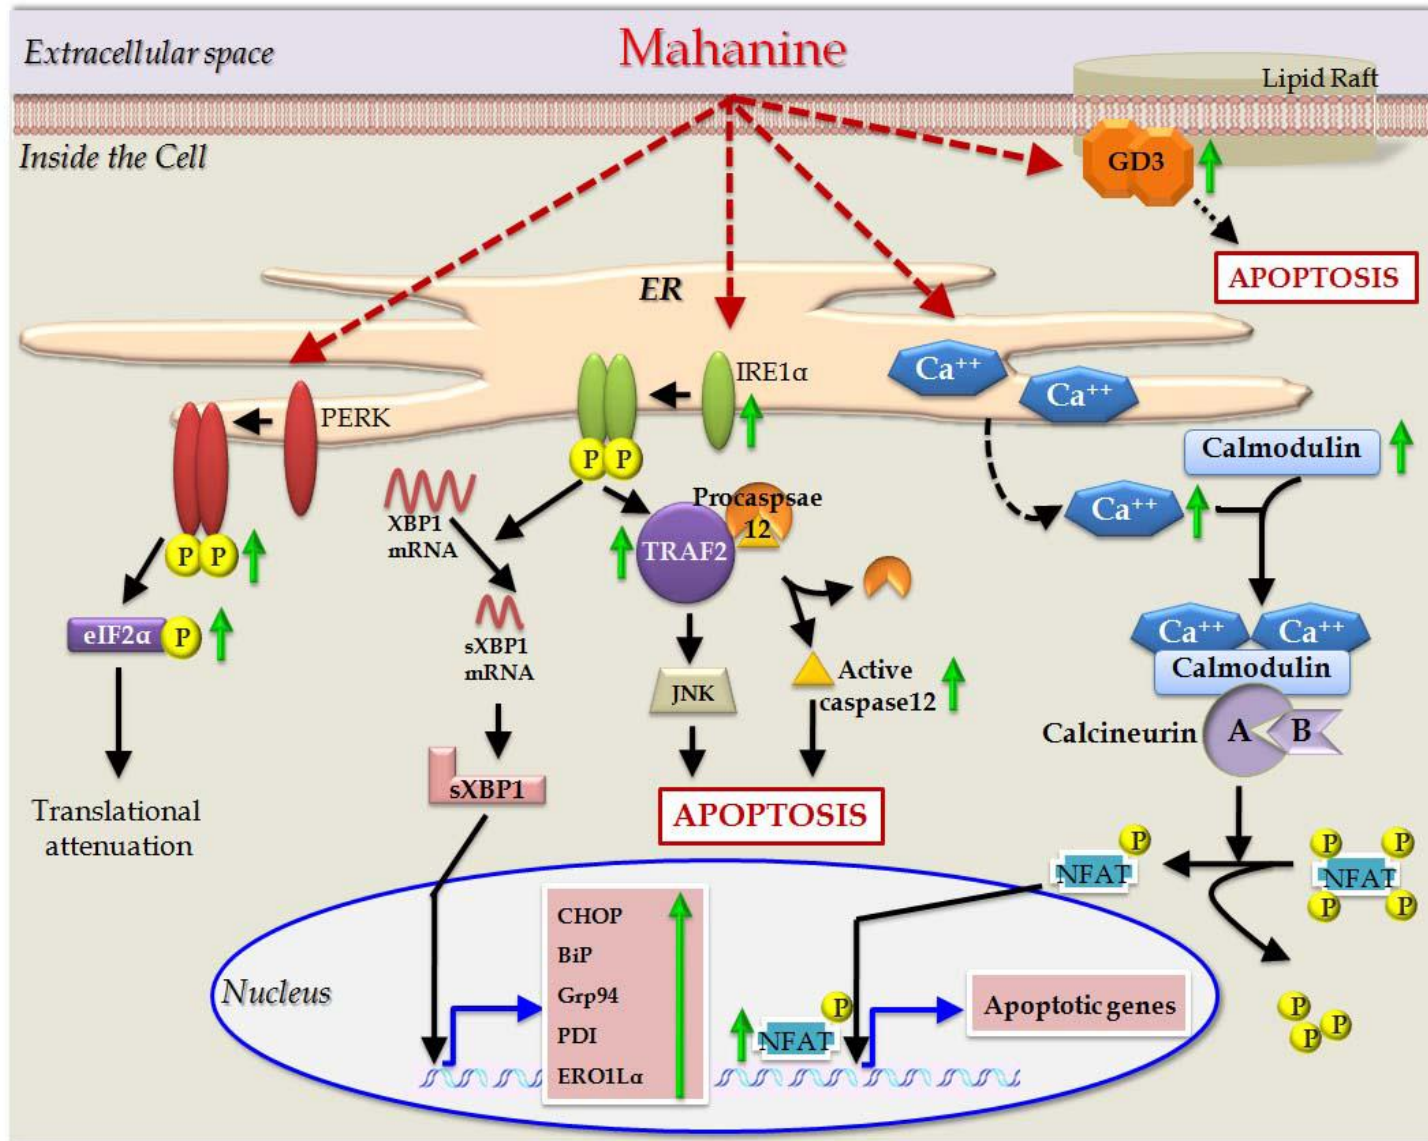

**Figure S5.** Schematic diagram of the summarized activity of mahanine on UPR activation and ER stress.

**Table S1**

| <b>Gene Symbol</b> | <b>Fold change</b> |
|--------------------|--------------------|
| <i>SEC23A</i>      | 2.1                |
| <i>ERP29</i>       | 1.55               |
| <i>ST8SIA1</i>     | 1.52               |
| <i>CREB3L4</i>     | 1.44               |
| <i>CREB3L1</i>     | 1.4                |
| <i>CREB3L2</i>     | 1.35               |
| <i>SELS</i>        | 1.35               |
| <i>COPA</i>        | 1.35               |
| <i>HERPUD1</i>     | 1.34               |
| <i>FKBP7</i>       | 1.34               |
| <i>ERAP2</i>       | 1.34               |
| <i>CREB3</i>       | 1.32               |
| <i>PDIA6</i>       | 1.31               |
| <i>ST8SIA1</i>     | 1.27               |
| <i>HSP90B1</i>     | 1.23               |
| <i>EDEM3</i>       | 1.23               |
| <i>CLGN</i>        | 1.22               |

**Table 1:** Changes in expression levels of a few genes in the classic UPR pathway
